# Supplementary material
Source: publisher figshare collection journal article supplement (https://acs.figshare.com/ndownloader/files/3906376)
Supplement: Supplementary file 1 [file 3906376]

## SUPPORTING INFORMATION

### **Simple Preparation of Polyelectrolyte Complex Beads for the Long-Term Release of Small Molecules**

Udaka K. de Silva,<sup>1</sup> Bernard E. Weik,<sup>1</sup> and Yakov Lapitsky<sup>1,2</sup>

<sup>1</sup> *Department of Chemical and Environmental Engineering, University of Toledo, Toledo, Ohio 43606*

<sup>2</sup> *School of Green Chemistry and Engineering, University of Toledo, Toledo, Ohio 43606*

#### **A. Comparison of Bead Volumes to Parent Droplet Volumes**

The volumes of PAH/PSS solution droplets were estimated based on their weights and densities (where the densities were measured by weighing known volumes of the PAH/PSS solutions). The volumes of the PEC beads were consistently greater than those of the parent solution droplets, indicating that water was taken up by the droplets during PEC formation.

**Table S1.** Average volumes of droplets and PEC beads ( $\pm$  standard deviation) at each polyelectrolyte solution composition.

| Polyelectrolyte Concentration | Droplet Volume (ml) | Bead Volume (ml)  |
|-------------------------------|---------------------|-------------------|
| 1.2 M PSS/<br>0.4 M PAH       | 0.025 $\pm$ 0.002   | 0.034 $\pm$ 0.001 |
| 1.5 M PSS/<br>0.5 M PAH       | 0.023 $\pm$ 0.001   | 0.030 $\pm$ 0.000 |
| 1.8 M PSS/<br>0.6 M PAH       | 0.025 $\pm$ 0.001   | 0.029 $\pm$ 0.002 |

## B. PSS Leaching into Acid during PEC Formation

The PSS leached during PEC formation was measured after the 3-h incubation period in the acid using UV-Vis spectroscopy at  $\lambda = 255$  nm ( $\epsilon = 364.5$  M<sup>-1</sup>cm<sup>-1</sup>; see Figure S1 and Table S2). Table S3 compares the water loss upon drying to the theoretical initial water content of the beads (estimated based on the initial PAH/PSS concentration, and the measured water uptake/PSS leaching during PEC formation). The mass loss upon drying is a few percent lower than the theoretical initial water content because: (1) trace amounts of water still likely remain within the dried PEC beads; and (2) the simplified model analysis ignores the simple electrolytes (e.g., HCl and NaCl), which may remain entrapped within the beads.

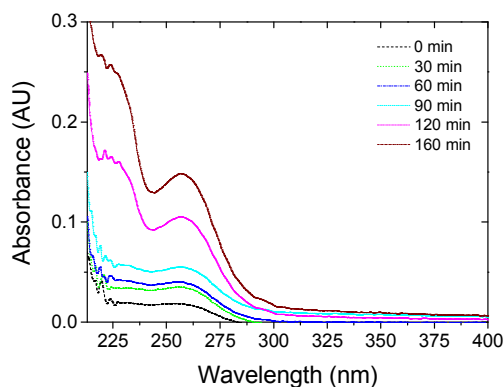

**Figure S1.** UV-Vis absorbance spectra for the release of PSS into 3 M acid solution (diluted 50 times) during the PEC formation process at the 1.5 M PSS/0.5 M PAH parent solution composition.

**Table S2.** Percentage of the PSS leached into the acid solution during PEC formation.

| Polyelectrolyte Concentration | % of PSS Released |
|-------------------------------|-------------------|
| 1.2 M PSS/<br>0.4 M PAH       | $32.9 \pm 0.01$   |
| 1.5 M PSS/<br>0.5 M PAH       | $34.1 \pm 0.02$   |
| 1.8 M PSS/<br>0.6 M PAH       | $37.8 \pm 0.01$   |

**Table S3.** Comparison of the average weight loss during drying to the theoretical water content ( $\pm$  standard deviations) present in the PEC beads after their formation.

| Polyelectrolyte Concentration | % Weight Loss Upon Drying | Theoretical Water Content in PEC Beads (wt. %) |
|-------------------------------|---------------------------|------------------------------------------------|
| 1.2 M PSS/<br>0.4 M PAH       | $80.4 \pm 0.0\%$          | $86.4 \pm 0.2$                                 |
| 1.5 M PSS/<br>0.5 M PAH       | $78.0 \pm 0.5 \%$         | $83.0 \pm 0.0$                                 |
| 1.8 M PSS/<br>0.6 M PAH       | $75.9 \pm 0.1 \%$         | $79.2 \pm 0.6$                                 |
